# Supplementary material for: The Relationship Between Vitamin D, Cardiovascular Health, and Periodontitis in US Adults
Source: Research Square preprint supplement (doi:10.21203/rs.3.rs-5727251/v1), 2025-01-01
Supplement: Supplementary file 1 [file 27c99e7ce9c098c992bc7076.docx]

Table S3 The mediation analysis of LE8 and subgroup scores in the association between serum Vitamin D and periodontitis.

|  | ACME | ADE | Total effect | Proportion mediated |
| --- | --- | --- | --- | --- |
| LE8 score |  |  |  |  |
| Total | **-0.0000676(-0.000125,0.00)** | **-0.000709(-0.00101, 0.00)** | **-0.000776 (-0.00107, 0.00)** | **8.71%** |
| Diabetes | -0.0000106(-0.000120,0.00) | **-0.000838(-0.00155,0.00)** | **-0.000848(-0.00155,0.00)** | 1.24% |
| Prediabetes | -0.000055(-0.0000633,0.00) | -0.000583(-0.00125,0.00) | -0.000527(-0.00118,0.00) | 10.4% |
| Normal glucose tolerance | **-0.0000889(-0.00016,0.00)** | **-0.000731(-0.00113,0.00)** | **-0.000820(-0.00122,0.00)** | **10.8%** |
| Health factor score |  |  |  |  |
| Total | **-0.0000552(-0.000101,0.00)** | **-0.000721(-0.00101, 0.00)** | **-0.000776 (-0.00107,0.00)** | **7.11%** |
| Diabetes | -0.0000362(-0.000119,0.00) | **-0.000812 (-0.00151,0.00)** | **-0.000848(-0.00155.0.00)** | 4.26% |
| Prediabetes | -0.0000737(-0.000102,0.00) | -0.000601(-0.00128,0.00) | -0.000527(-0.00118,0.00) | 14.0% |
| Normal glucose tolerance | **-0.000069(-0.000124,0.00)** | **-0.000751(-0.001148,0.00)** | **-0.000820 (-0.00122,0.00)** | **8.4%** |
| Health behavior score |  |  |  |  |
| Total | -0.0000137(-0.0000548,0.00) | **-0.000762(-0.00106,0.00)** | **-0.000776(-0.00107,0.00)** | 1.77% |
| Diabetes | 0.0000553(-0.0000397, 0.00) | **-0.000904(-0.00164,0.00)** | **-0.000848(-0.00155,0.00)** | 6.52% |
| Prediabetes | -0.0000485(-0.000158,0.00) | -0.000479(-0.00116,0.00) | -0.000527(-0.00118,0.00) | 9.19% |
| Normal glucose tolerance | -0.000023 (-0.0000817,0.00) | **-0.000797(-0.00121,0.00)** | **-0.000820(-0.00122,0.00)** | 2.8% |

Abbreviations: ACME, average causal mediation effect, ADE, average direct effect.

Adjusted analyses adjusted for age, gender, education level, PIR, smoking status, alcohol status, hypertension and hyperlipidemia.
