# Supplementary material for: The Relationship Between Vitamin D, Cardiovascular Health, and Periodontitis in US Adults
Source: Research Square preprint supplement (doi:10.21203/rs.3.rs-5727251/v1), 2025-01-01
Supplement: Supplementary file 2 [file 7aa469a3ade90f4ba92e8a06.docx]

**Table S1:** Scoring methods for evaluating LE8 score of individuals.

| **domain** | **CVH metric** | **Method of measurement** | **Quantification of CVH metric** |
| --- | --- | --- | --- |
| **Health Behaviors** | **Diet** | Measurement: Self-reported daily intake of a DASH-style eating pattern | Metrics: DASH diet score or Healthy Eating Index-2015 (for populations) |
| Points Quantile  100 ≥95th percentile (top/ideal diet)  80 75th–94th percentile  50 50th–74th percentile  25 25th–49th percentile  0 1st–24th percentile (bottom/ least ideal quartile) |
| **Physical activity score** | Measurement: Self-reported minutes of moderate or vigorous physical activity per week | Metrics: Minutes of moderate to vigorous physical activity per week |
| Points Minutes  100 ≥150 minutes  90 120-149 minutes  80 90-119 minutes  60 60-89 minutes  40 30-59 minutes  20 1-29 minutes  0 0 minutes |
| **Tobacco/nicotine exposure score** | Measurement: Self-reported use of cigarettes or inhaled nicotine-delivery system (NDS), or secondhand smoke exposure | Metrics: Combustible tobacco use or inhaled NDS use; or secondhand smoke exposure |
| Points Status  100 Never smoker  75 Former smoker, quit ≥ 5 years  50 Former smoker, quit 1–<5 years  25 Former smoker, quit <1 y, or currently using inhaled NDS   1. Current smoker   Subtract 20 points (unless score is 0) for living with active indoor smoker in home |
| **Sleep health score** | Measurement: Self-reported average hours of sleep per night | Metrics: Average hours of sleep per night |
| Points Level  100 7-9 hours  90 9-<10 hours  70 6–<7 hours  40 5–<6 or ≥10 hours  20 4–<5 hours  0 < 4 hours |
| **Health Factors** | **Body mass index** | Measurement: Body mass index (BMI) was divided by the square of the height in meters and weight measurements. | Metrics: BMI |
| Points Level  100 <25kg/m2  70 25.0-29.9 kg/m2  30 30.0-34.9 kg/m2  15 35.0-39.9 kg/m2  0 ≥ 40.0 kg/m2 |
| **Blood lipid** | Measurement: Non-high-density lipoprotein (non-HDL) cholesterol was calculated by total cholesterol minus HDL cholesterol. | Metrics: Non-HDL cholesterol |
| Points Level  100 <130 mg/dL  60 130-159 mg/dL  40 160-189 mg/dL  20 190-219 mg/dL  0 ≥ 220 mg/dL  If drug-treated level, subtract 20 points |
| **Blood glucose** | Measurement: Fasting blood glucose or casual hemoglobin A1c | Metrics: FBG or HbA1c |
| Points Level  100 No history of diabetes and FBG <100 mg/dL (or HbA1c <5.7 %)  60 No diabetes and FBG 100–125 mg/dL (or HbA1c 5.7–6.4%)  40 Diabetes with HbA1c <7.0 %  30 Diabetes with HbA1c 7.0–7.9 %  20 Diabetes with HbA1c 8.0–8.9 %  10 Diabetes with Hb A1c 9.0–9.9 %  0 Diabetes with HbA1c ≥10.0 % |
| **Blood pressure** | Measurement: The average of measured pressurewas used to calculate SBP and DBP. | Metrics: Systolic and diastolic blood pressure |
| Points Level  100 <120/<80 mmHg (optimal)  75 120-129/<80 mmHg (elevated)  50 130-139 or 80-89 mmHg (stage 1 hypertension)  25 140-159 or 90-99 mmHg  0 ≥ 160 or ≥ 100 mmHg  Subtract 20 points (unless score is 0) if treated level |
