# Supplementary material for: The Relationship Between Vitamin D, Cardiovascular Health, and Periodontitis in US Adults
Source: Research Square preprint supplement (doi:10.21203/rs.3.rs-5727251/v1), 2025-01-01
Supplement: Supplementary file 3 [file c164de02b6b3f08e1715845b.docx]

Table S2 Descriptions of study individuals’ characteristics s according to their periodontitis and diabetes status.

| **Characteristic** | **Total participants** | **Diabetes with Periodontitis** | **Periodontitis without diabetes** | **Diabetes without periodontitis** | **Without periodontitis and diabetes** | **p. overall** |
| --- | --- | --- | --- | --- | --- | --- |
|  | ***N=12714*** | ***N=1024*** | ***N=3498*** | ***N=1492*** | ***N=6700*** |  |
| Age,y,n(%) |  |  |  |  |  | <0.001 |
| <=40 | 3013(24.9%) | 59(6.1%) | 665(18.7%) | 118(9.1%) | 2171(31.7%) |  |
| 40-60 | 5255(46.4%) | 414(45.4%) | 1657(52.3%) | 511(40.3%) | 2673(45.1%) |  |
| >60 | 4446(28.7%) | 551(48.5%) | 1176(29.0%) | 863(50.6%) | 1856(23.3%) |  |
| Gender, n(%) |  |  |  |  |  | <0.001 |
| Male | 6186(48.1%) | 625(62.9%) | 2114(60.7%) | 686(46.7%) | 2761(41.8%) |  |
| Female | 6528(51.9%) | 399(37.1%) | 1384(39.3%) | 806(53.3%) | 3939(58.2%) |  |
| Educational level, n(%) |  |  |  |  |  | <0.001 |
| Below high school | 3290(17.4%) | 382(27.5%) | 1068(22.9%) | 507(25.0%) | 1333(13.0%) |  |
| High School or above | 9424(82.6%) | 642(72.5%) | 2430(77.1%) | 985(75.0%) | 5367(87.0%) |  |
| Race/ethnicity, n(%) |  |  |  |  |  | <0.001 |
| Mexican American | 1753(7.8%) | 221(13.7%) | 597(10.7%) | 198(7.6%) | 737(6.1%) |  |
| Non-Hispanic White | 5623(69.2%) | 291(53.9%) | 1385(63.0%) | 584(63.2%) | 3363(74.1%) |  |
| Non-Hispanic Black | 2592(10.5%) | 277(16.2%) | 789(12.8%) | 382(14.4%) | 1144(8.4%) |  |
| Other | 2746(12.5%) | 235(16.1%) | 727(13.6%) | 328(14.9%) | 1456(11.3%) |  |
| Marital status, n(%) |  |  |  |  |  | <0.001 |
| Yes | 7998(67.9%) | 620(65.3%) | 2205(65.7%) | 833(59.9%) | 4340(70.3%) |  |
| No | 4716(32.1%) | 404(34.7%) | 1293(34.3%) | 659(40.1%) | 2360(29.7%) |  |
| Poverty income ratio, n(%) |  |  |  |  |  | <0.001 |
| Low income | 3781(19.5%) | 369(26.8%) | 1178(23.4%) | 512(25.7%) | 1722(16.3%) |  |
| Middle income | 5222(39.1%) | 467(44.6%) | 1511(44.1%) | 635(41.6%) | 2609(36.2%) |  |
| High income | 3711(41.3%) | 188(28.6%) | 809(32.5%) | 345(32.6%) | 2369(47.5%) |  |
| Vitamin D implement, n(%) |  |  |  |  |  | 0.002 |
| Yes | 4369(38.8%) | 301(34.6%) | 1110(35.9%) | 534(37.6%) | 2424(40.5%) |  |
| No | 8345(61.2%) | 723(65.4%) | 2388(64.1%) | 958(62.4%) | 4276(59.5%) |  |
| Alcohol status, n(%) |  |  |  |  |  | <0.001 |
| Now | 8220(71.0%) | 636(68.7%) | 2436(75.4%) | 841(61.1%) | 4307(71.0%) |  |
| Ever | 1578(10.2%) | 138(11.7%) | 401(9.4%) | 252(15.9%) | 787(9.5%) |  |
| Never | 2916(18.8%) | 250(19.6%) | 661(15.1%) | 399(23.0%) | 1606(19.5%) |  |
| Smoking status, n(%): |  |  |  |  |  | <0.001 |
| Now | 2517(18.6%) | 193(19.4%) | 976(28.1%) | 222(13.9%) | 1126(15.3%) |  |
| Ever | 3340(27.0%) | 343(36.0%) | 898(26.7%) | 514(35.7%) | 1585(24.9%) |  |
| Never | 6857(54.4%) | 488(44.6%) | 1624(45.1%) | 756(50.3%) | 3989(59.8%) |  |
| Obesity, n(%) |  |  |  |  |  | <0.001 |
| Yes | 4882(37.7%) | 563(60.2%) | 1154(32.1%) | 854(62.4%) | 2311(34.1%) |  |
| No | 7832(62.3%) | 461(39.8%) | 2344(67.9%) | 638(37.6%) | 4389(65.9%) |  |
| Abdominal obesity, n(%) |  |  |  |  |  | <0.001 |
| Yes | 10678(83.6%) | 944(91.4%) | 2975(85.7%) | 1325(89.9%) | 5434(81.0%) |  |
| No | 2036(16.4%) | 80(8.6%) | 523(14.3%) | 167(10.1%) | 1266(19.0%) |  |
| Hypertension, n(%) |  |  |  |  |  | <0.001 |
| Yes | 12371(97.5%) | 1011(98.6%) | 3440(98.5%) | 1458(97.9%) | 6462(96.9%) |  |
| No | 343(2.5%) | 13(8.6%) | 58(1.5%) | 34(2.1%) | 238(3.1%) |  |
| Hyperlipidemia, n(%) |  |  |  |  |  | <0.001 |
| Yes | 9231(73.1%) | 838(83.6%) | 2530(73.4%) | 1210(83.3%) | 4653(70.4%) |  |
| No | 3483(26.9%) | 186(16.4%) | 968(26.6%) | 282(16.7%) | 2047(29.6%) |  |
| Heart failure, n(%) |  |  |  |  |  | <0.001 |
| Yes | 399(2.5%) | 63(6.7%) | 74(2.2%) | 132(8.6%) | 130(1.3%) |  |
| No | 12315(97.5%) | 961(93.3%) | 3424(97.8%) | 1360(91.4%) | 6570(98.7%) |  |
| Stroke, n(%) |  |  |  |  |  | <0.001 |
| Yes | 502(3.0%) | 59(5.6%) | 112(2.7%) | 135(7.7%) | 196(2.2%) |  |
| No | 12212(97.0%) | 965(94.4%) | 3386(97.3%) | 1357(92.3%) | 6504(97.8%) |  |
| Liver disease, n(%) |  |  |  |  |  | <0.001 |
| Yes | 529(3.6%) | 66(6.7%) | 126(3.3%) | 117(7.0%) | 220(2.8%) |  |
| No | 12185(96.4%) | 958(93.3%) | 3372(96.7%) | 1375(93.0%) | 6480(97.2%) |  |
| Coronary heart disease, n(%) |  |  |  |  |  | <0.001 |
| Yes | 501(3.4%) | 73(8.1%) | 116(3.4%) | 141(9.7%) | 171(2.0%) |  |
| No | 12213(96.6%) | 951(91.9%) | 3382(96.6%) | 1351(90.3%) | 6529(98.0%) |  |
| Gout, n(%) |  |  |  |  |  | <0.001 |
| Yes | 611(4.4%) | 85(9.0%) | 140(3.7%) | 151(9.9%) | 235(3.4%) |  |
| No | 12103(95.6%) | 939(91.0%) | 3358(96.3%) | 1341(90.1%) | 6465(96.6%) |  |
| Log NLR,  mean(SD) | 0.71(0.08) | 0.79(0.23) | 0.71(0.12) | 0.82(0.15) | 0.69(0.09) | <0.001 |
| Log PLR,  mean(SD) | 4.77(0.07) | 4.71(0.17) | 4.76(0.10) | 4.75(0.13) | 4.78(0.09) | <0.001 |
| Log MLR,  mean(SD) | -1.32(0.07) | -1.32(0.20) | -1.30(0.11) | -1.28(0.14) | -1.34(0.07) | <0.001 |
| Albumin, g/L, mean (SD) | 42.58(0.64) | 41.6(1.35) | 42.6(0.79) | 41.3(1.02) | 42.9(0.77) | <0.001 |
| Total LE8 score, n(%) |  |  |  |  |  | <0.001 |
| Low | 810(5.1%) | 169(15.2%) | 204(5.3%) | 204(13.5%) | 233(2.8%) |  |
| Medium | 9520(72.6%) | 831(82.5%) | 2744(76.9%) | 1232(82.1%) | 4713(68.4%) |  |
| High | 2384(22.3%) | 24(2.3%) | 550(17.8%) | 56(4.4%) | 1754(28.9%) |  |
| Health behaviors score, n(%) |  |  |  |  |  | <0.001 |
| Low | 998(7.1%) | 74(6.7%) | 402(11.1%) | 101(6.5%) | 421(5.5%) |  |
| Medium | 5101(37.3%) | 489(45.8%) | 1484(41.4%) | 683(42.6%) | 2445(34.0%) |  |
| High | 6615(55.6%) | 461(47.5%) | 1612(47.5%) | 708(50.9%) | 3834(60.5%) |  |
| Health factors score, n(%) |  |  |  |  |  | <0.001 |
| Low | 3225(22.9%) | 553(55.5%) | 709(19.1%) | 789(54.2%) | 1174(16.6%) |  |
| Medium | 7173(56.9%) | 451(42.1%) | 2173(62.3%) | 665(43.4%) | 3884(58.2%) |  |
| High | 2316(20.2%) | 20(2.3%) | 616(18.7%) | 38(2.4%) | 1642(25.3%) |  |
